# Supplementary material for: Artificial Intelligence-Based Prediction of Oroantral Communication after Tooth Extraction Utilizing Preoperative Panoramic Radiography
Source: MDPI journal article supplement (doi:10.3390/diagnostics12061406), 2022-06-06
Supplement: s1 [file s1]

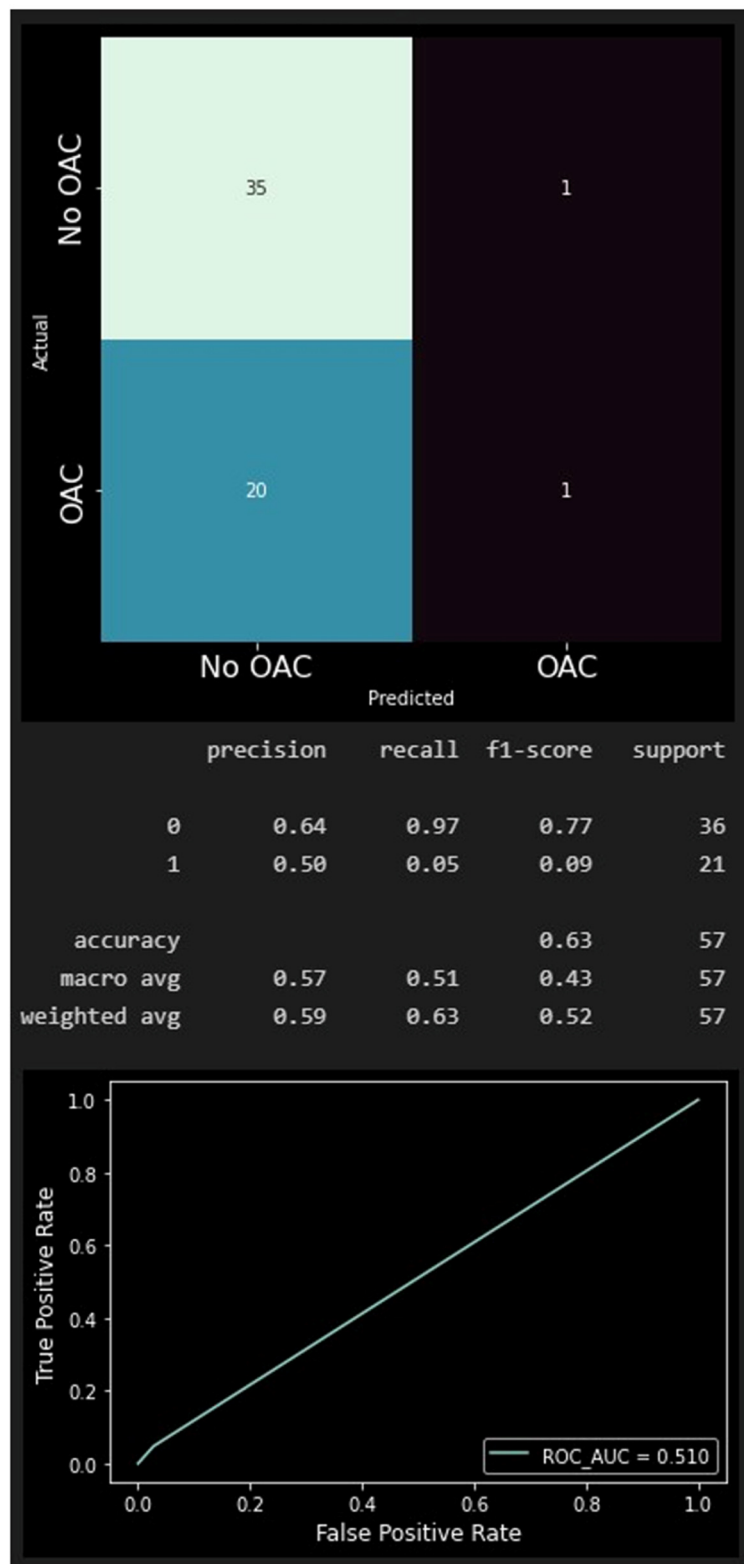

**Figure S1.** Confusion matrix, model performance measures, and receiver operating characteristic (ROC) curve for the EfficientNet algorithm. Precision:  $TP/(TP+FP)$ ; Recall:  $TP/(TP+FN)$ ; F1 score:  $2 \times (\text{recall} \times \text{precision}) / (\text{recall} + \text{precision})$ ; support: actual occurrence of the class in the dataset. Values are showing the metrics for the independent test dataset (hold-out dataset).

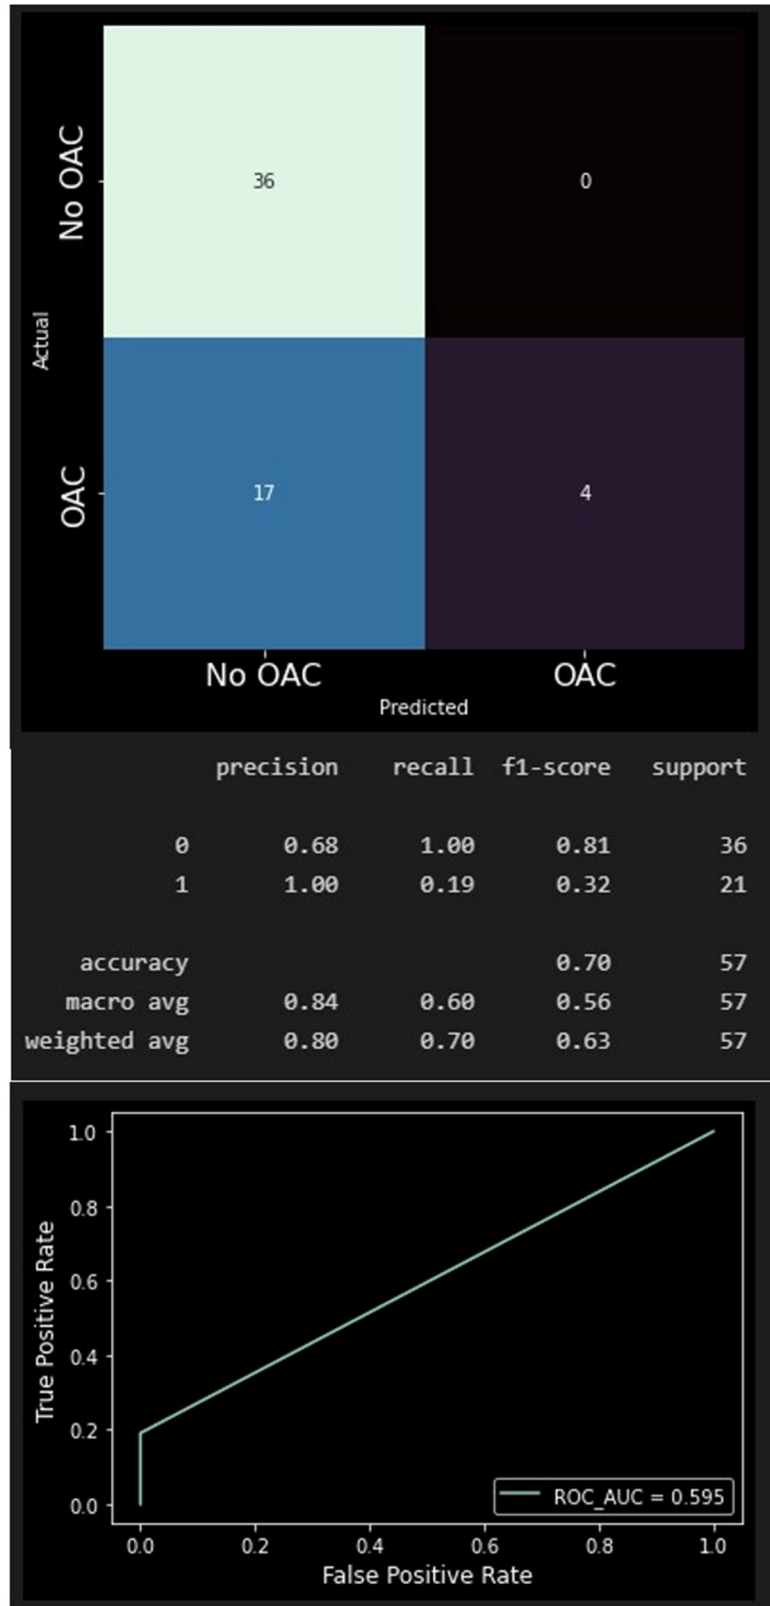

**Figure S2.** Confusion matrix, model performance measures and receiver operating characteristic (ROC) curve for the InceptionV3 algorithm. Precision:  $TP/(TP+FP)$ ; Recall:  $TP/(TP+FN)$ ; F1 score:  $2 \cdot (\text{recall} \cdot \text{precision}) / (\text{recall} + \text{precision})$ ; support: actual occurrence of the class in the dataset. Values are showing the metrics for the independent test dataset (hold-out dataset).

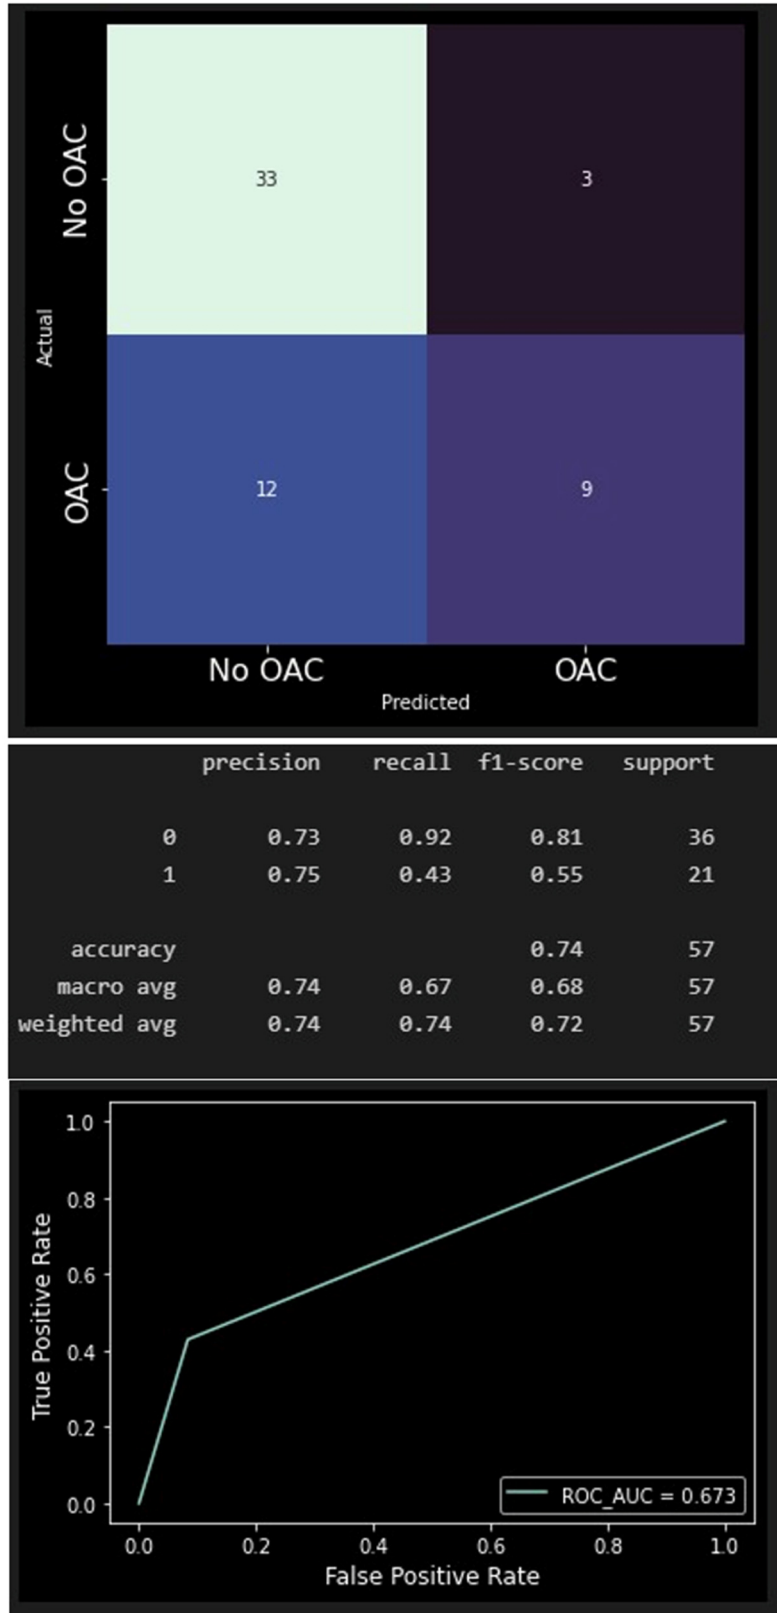

**Figure S3.** Confusion matrix, model performance measures and receiver operating characteristic (ROC) curve for the MobileNetV2 algorithm. Precision:  $TP/(TP+FP)$ ; Recall:  $TP/(TP+FN)$ ; F1 score:  $2 \times (\text{recall} \times \text{precision}) / (\text{recall} + \text{precision})$ ; support: actual occurrence of the class in the dataset. Values are showing the metrics for the independent test dataset (hold-out dataset).

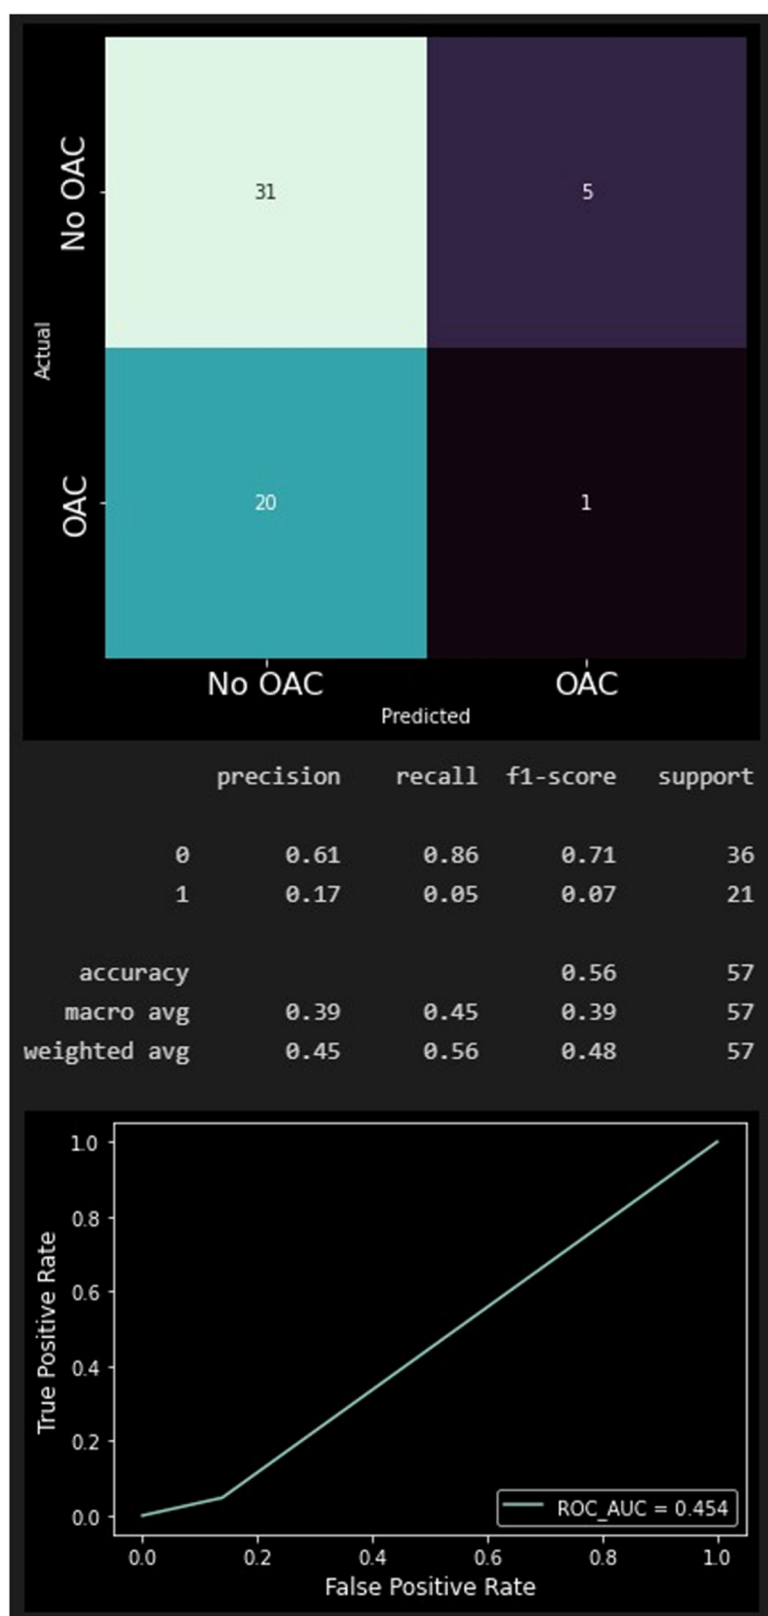

**Figure S4.** Confusion matrix, model performance measures and receiver operating characteristic (ROC) curve for the ResNet50 algorithm. Precision:  $TP/(TP+FP)$ ; Recall:  $TP/(TP+FN)$ ; F1 score:  $2 \cdot (\text{recall} \cdot \text{precision}) / (\text{recall} + \text{precision})$ ; support: actual occurrence of the class in the dataset. Values are showing the metrics for the independent test dataset (hold-out dataset).

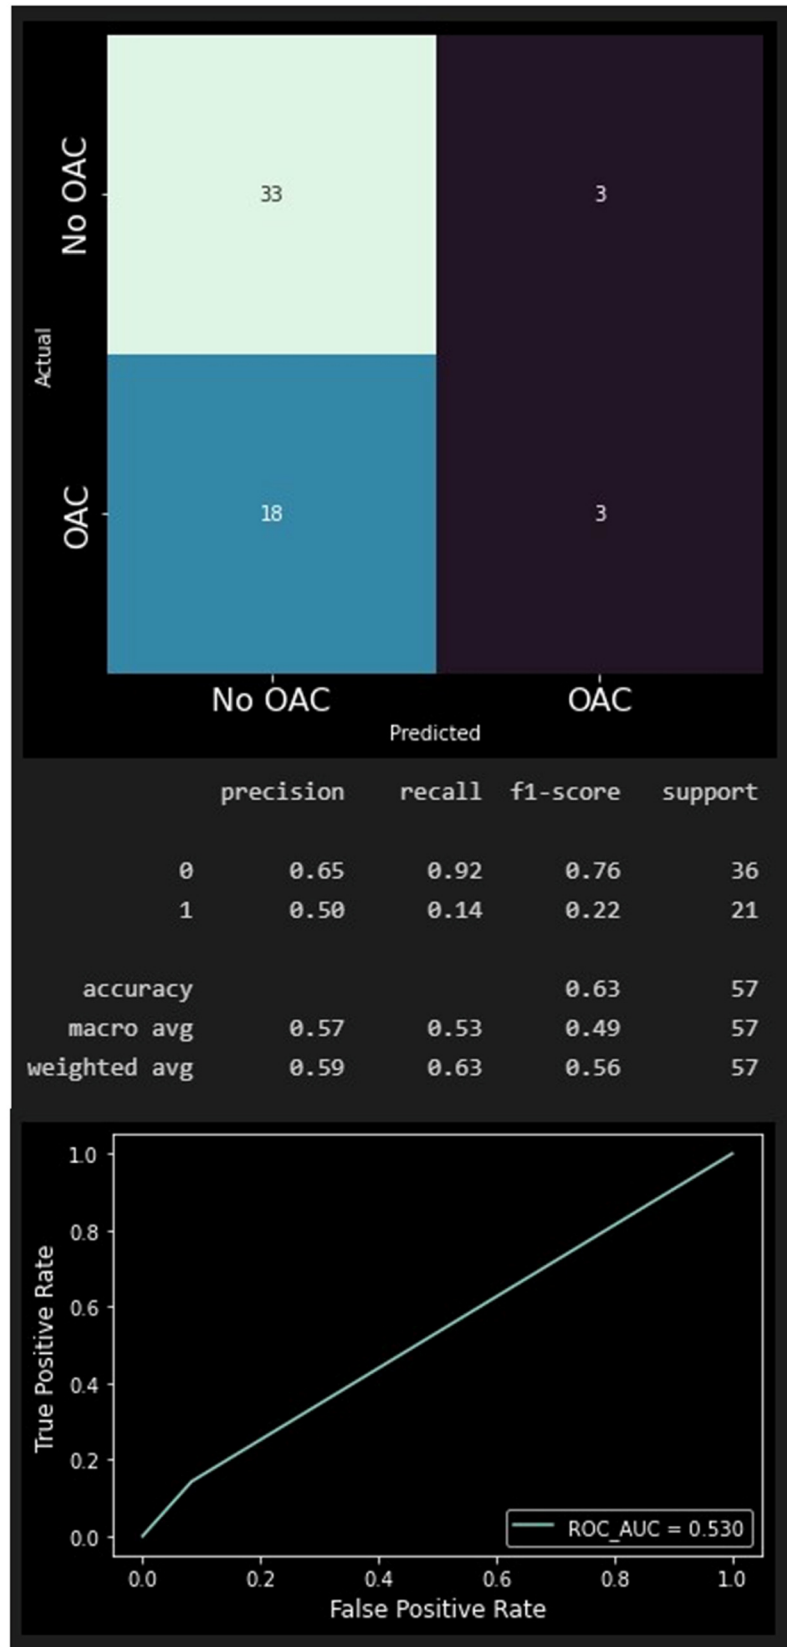

**Figure S5.** Confusion matrix, model performance measures, and receiver operating characteristic (ROC) curve for the VGG16 algorithm. Precision:  $TP/(TP+FP)$ ; Recall:  $TP/(TP+FN)$ ; F1 score:  $2 \cdot (\text{recall} \cdot \text{precision}) / (\text{recall} + \text{precision})$ ; support: actual occurrence of the class in the dataset. Values are showing the metrics for the independent test dataset (hold-out dataset).
