# Supplementary figures and images for: Artificial Intelligence-Based Prediction of Oroantral Communication after Tooth Extraction Utilizing Preoperative Panoramic Radiography
Source: MDPI journal article supplement (doi:10.3390/diagnostics12061406), 2022-06-06

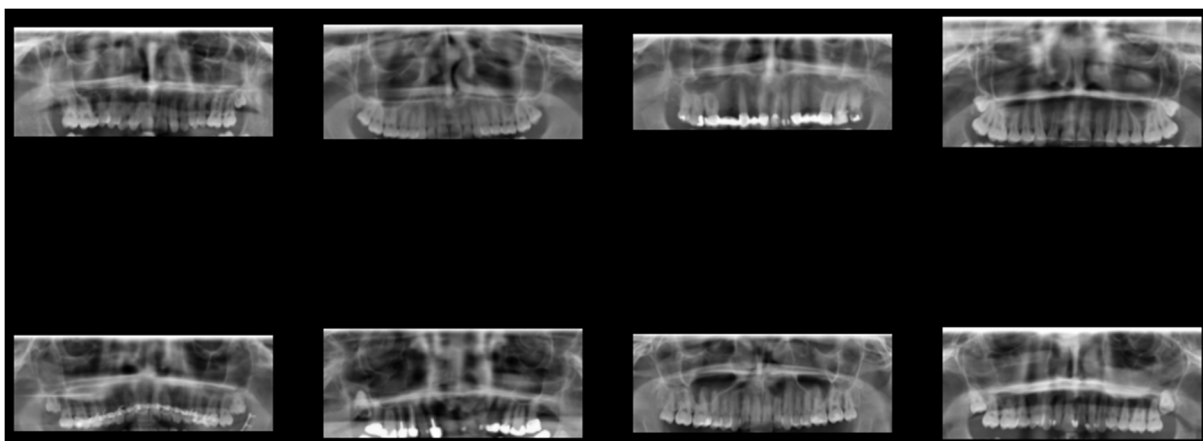

**Figure S6.** Example images from the whole data set.

Supplement: s1 [file s1]
